# Supplementary material for: Facile Synthesis of B/P Co-Doping Multicolor Emissive Carbon Dots Derived from Phenylenediamine Isomers and Their Application in Anticounterfeiting
Source: MDPI journal article supplement (doi:10.3390/nano14100813), 2024-05-07
Supplement: s1 [file s1]

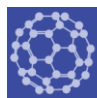

## Article

# Facile Synthesis of B/P Co-Doping Multicolor Emissive Carbon Dots Derived from Phenylenediamine Isomers and Their Application in Anticounterfeiting

Zhiwei Li <sup>1,2</sup>

<sup>1</sup> Key Laboratory for Polymeric Composite and Functional Materials of Ministry of Education, School of Chemistry, Sun Yat-sen University, Guangzhou 510275, China; lizhw36@mail2.sysu.edu.cn

<sup>2</sup> State Key Laboratory of Optoelectronic Materials and Technologies, Sun Yat-sen University, Guangzhou 510275, China

**Abstract:** Carbon dots (CDs) possess a considerable number of beneficial features for latent applications in biotargeted drugs, electronic transistors, and encrypted information. The synthesis of fluorescent carbon dots has become a trend in contemporary research, especially in the field of controllable multicolor fluorescent carbon dots. In this study, an elementary one-step hydrothermal method was employed to synthesize the multicolor fluorescent carbon dots by co-doping unique phenylenediamine isomers (o-PD, m-PD, and p-PD) with B and P elements, which under 365 nm UV light exhibited signs of lavender-color, grass-color, and tangerine-color fluorescence, respectively. Further investigations reveal the distinctness in the polymerization, surface-specific functional groups, and graphite N content of the multicolor CDs, which may be the chief factor regarding the different optical behaviors of the multicolor CDs. This new work offers a route for the exploration of multicolor CDs using B/P co-doping and suggests great potential in the field of optical materials, important information encryption, and commercial anticounterfeiting labels.

**Keywords:** phenylenediamine; isomer; multicolor CDs; co-doping; anticounterfeiting

**Citation:** Li, Z. Facile Synthesis of B/P Co-Doping Multicolor Emissive Carbon Dots Derived from Phenylenediamine Isomers and Their Application in Anticounterfeiting. *Nanomaterials* **2024**, *14*, 813. <https://doi.org/10.3390/nano14100813>

Academic Editor: Michael Tiemann

Received: 15 April 2024

Revised: 3 May 2024

Accepted: 4 May 2024

Published: 7 May 2024

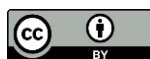

**Copyright:** © 2024 by the author. Licensee MDPI, Basel, Switzerland. This article is an open access article distributed under the terms and conditions of the Creative Commons Attribution (CC BY) license (<https://creativecommons.org/licenses/by/4.0/>).

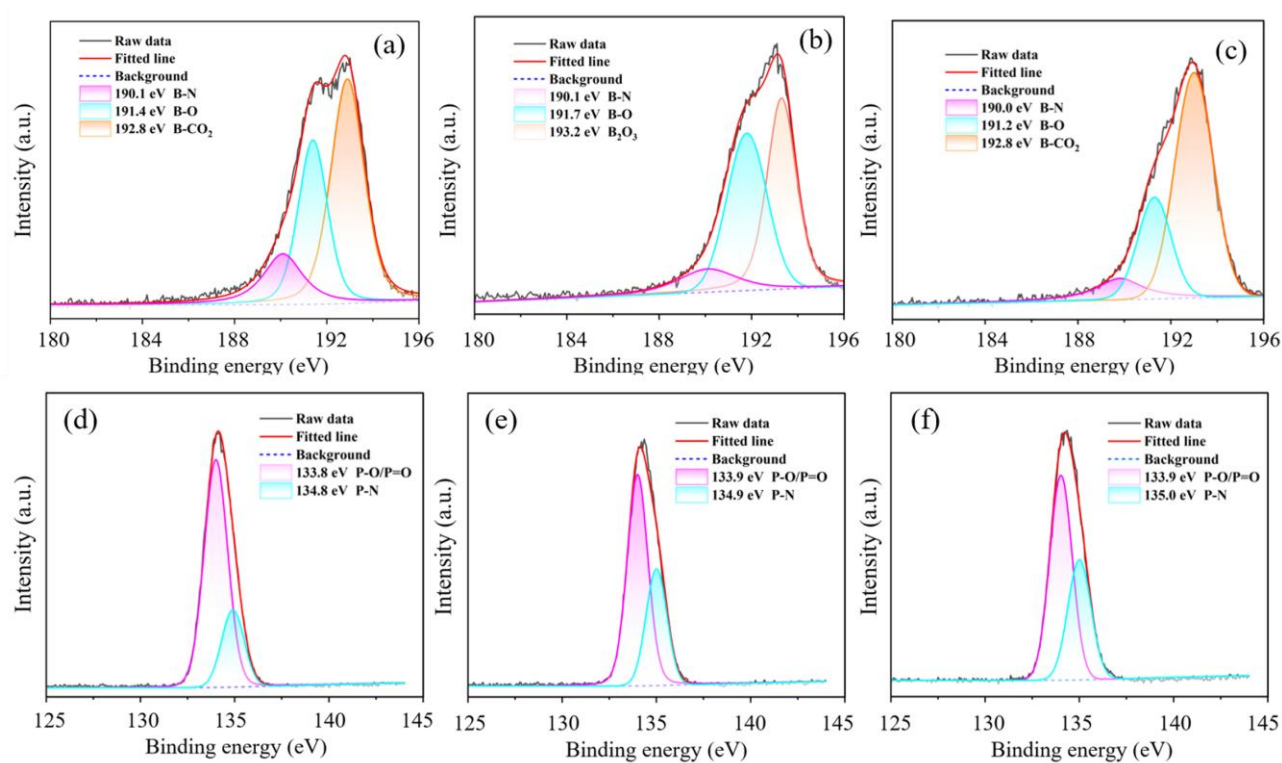

**Figure S1.** (a–c) High-resolution XPS spectra of B 1s for L-CDs, G-CDs and T-CDs. (d–f) High-resolution XPS spectra of P 2p for L-CDs, G-CDs and T-CDs.

**Table S1.** Specific optical parameters of the multicolor CDs.

| sample                                                          | L-CDs   | G-CDs   | T-CDs   |
|-----------------------------------------------------------------|---------|---------|---------|
| Ex/Em (nm)                                                      | 344/414 | 458/515 | 537/619 |
| molar absorption coefficients ( $\text{cm}^{-1}\text{M}^{-1}$ ) | 558     | 459     | 472     |
| fluorescence quantum yield                                      | 5.2 %   | 6.0 %   | 4.5 %   |
| fluorescent brightness                                          | 29.02   | 27.54   | 21.24   |

**Disclaimer/Publisher's Note:** The statements, opinions and data contained in all publications are solely those of the individual author(s) and contributor(s) and not of MDPI and/or the editor(s). MDPI and/or the editor(s) disclaim responsibility for any injury to people or property resulting from any ideas, methods, instructions or products referred to in the content.
